# Supplementary material
Source: Royal Society of Chemistry journal article supplement (doi:10.1039/d6nr00351f)
Supplement: d6nr00351f1.pdf [file d6nr00351f1.pdf]

## Supplementary Information

### **Synergistic Regulation of Key Process Parameters on the Structure and Electrochromic Performance of Sol-Gel Derived WO<sub>3</sub> Films: Amorphous Superiority at 100 °C**

Mengyao Zhao,<sup>†a</sup> Hui Zhao,<sup>†a</sup> Siyuan Liu,<sup>a</sup> Yijing Wang,<sup>a</sup> Yingxing Yang,<sup>a</sup> Jinhua Lai,<sup>\*a</sup> Xiaomei Yu,<sup>a</sup> Songjie Li,<sup>\*a</sup> and Jin You Zheng <sup>\*a</sup>

<sup>a</sup> *State Key Laboratory of Coking Coal Resources Green Exploitation; Engineering Research Center of Advanced Functional Material Manufacturing of Ministry of Education; School of Chemical Engineering, Zhengzhou University, Zhengzhou 450001, China.*

<sup>†</sup> *These authors contributed equally to this work and should be considered co-first authors.*

\* Corresponding author: [jinyouzh@zzu.edu.cn](mailto:jinyouzh@zzu.edu.cn), [songjie@zzu.edu.cn](mailto:songjie@zzu.edu.cn), [jhlai@zzu.edu.cn](mailto:jhlai@zzu.edu.cn),

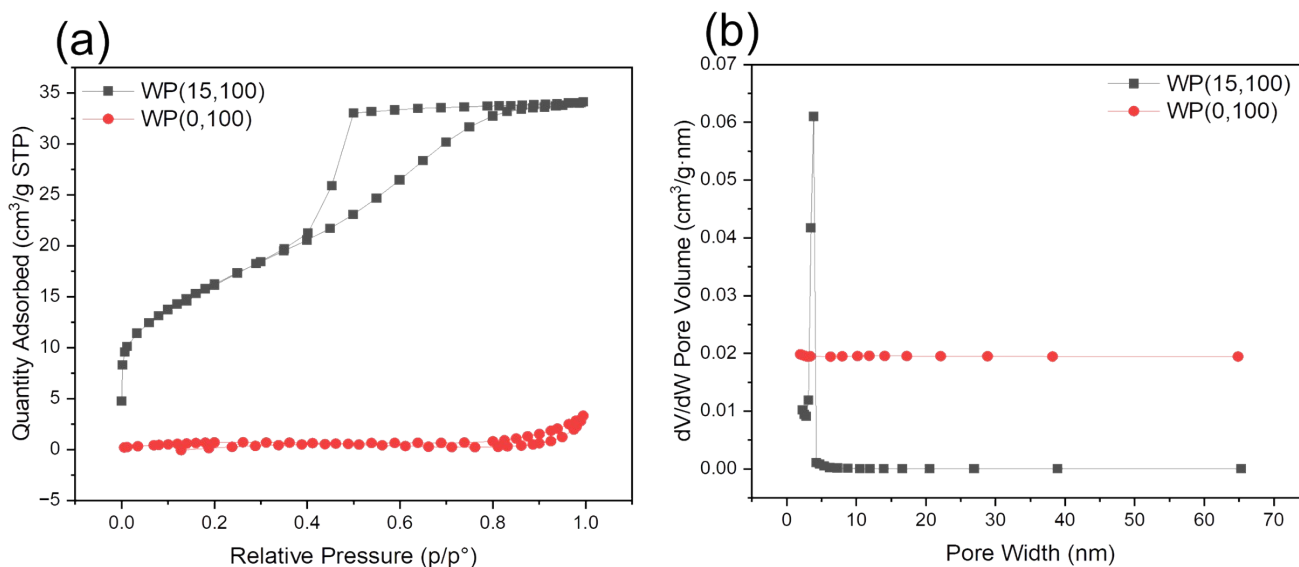

**Figure S1.** (a) N<sub>2</sub> adsorption–desorption isotherms and (b) pore size distributions of PTA-derived powder samples of WP(0,100) and WP(15,100).

Preparation of WP(0,100) and WP(15,100) powder samples for N<sub>2</sub> adsorption–desorption isotherms testing: 15 g of tungstic acid was dissolved in 100 mL of 30% hydrogen peroxide solution and stirred for 96 h. 10 mL of the resulting supernatant was dried at 100°C in an oven to form a powder, denoted as WP(0,100). 10 mL of the PTA solution was stirred at 80°C for 15 h in a water bath, followed by drying at 100°C in an oven to obtain the powder designated as WP(15,100). Both samples were first degassed at 120°C under vacuum for 6–10 h in a degassing station to remove surface-adsorbed water and impurities. Nitrogen physisorption measurements were then performed at liquid-nitrogen temperature (–196°C) to characterize the samples' textural properties.

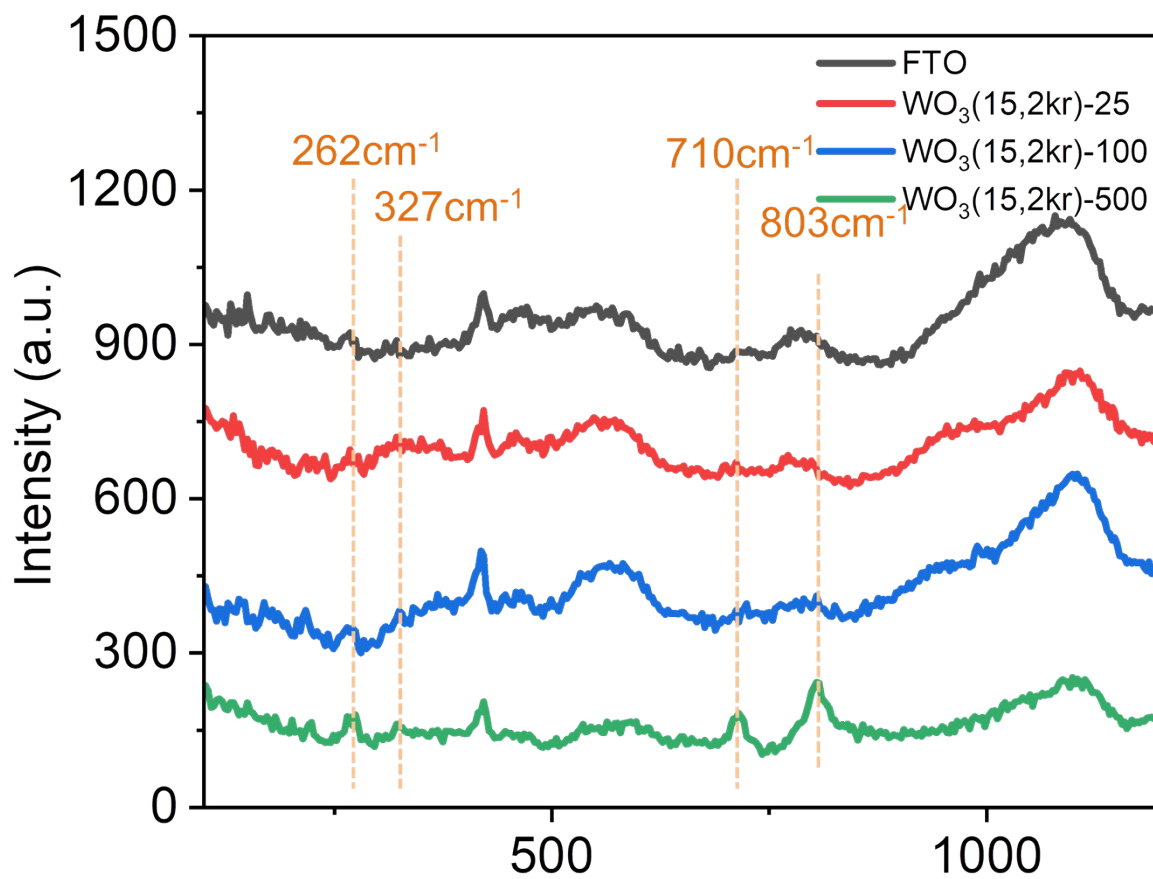

Figure S2. Raman spectra of WO<sub>3</sub> thin films annealed at different temperatures.

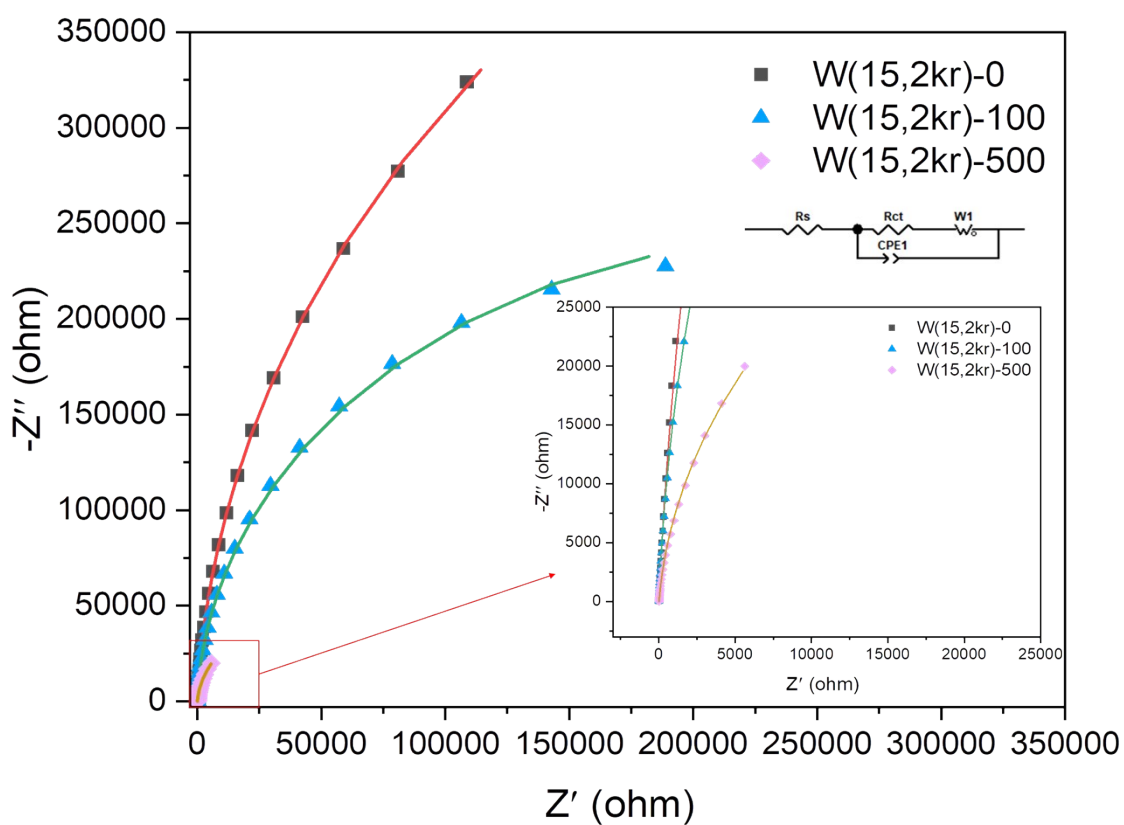

| Samples                      | $R_s$ (ohm) | $R_{ct}$ (ohm) |
|------------------------------|-------------|----------------|
| WO <sub>3</sub> (15,2kr)-25  | 9.794       | 1193100        |
| WO <sub>3</sub> (15,2kr)-100 | 10.76       | 498240         |
| WO <sub>3</sub> (15,2kr)-500 | 19.5        | 43381          |

**Figure S3.** EIS curves and corresponding parameters of WO<sub>3</sub>(15,2kr)-25, WO<sub>3</sub>(15,2kr)-100, and WO<sub>3</sub>(15,2kr)-500 films.
